# Supplementary material for: A Bidirectional Permeability Assay for beyond Rule of 5 Compounds
Source: MDPI journal article supplement (doi:10.3390/pharmaceutics13081146), 2021-07-27
Supplement: s1 [file s1]

# Supplementary Materials: A Bidirectional Permeability Assay for Beyond Rule of 5 Compounds

Yunhai Cui, Cyril Desevaux, Ines Truebenbach, Peter Sieger, Klaus Klinder, Alan Long and Achim Sauer

**Table S1.** Compounds used for the analyses shown in Figure 4.

| Compound | cLogP | MW    | $P_{app,Intrinsic}$<br>( $10^{-6}$ cm/s) | $P_{app,Intrinsic}$<br>( $10^{-6}$ cm/s) | $P_{app,Intrinsic}$ (modified as-<br>say)/ $P_{app,Intrinsic}$ (standard<br>assay) |
|----------|-------|-------|------------------------------------------|------------------------------------------|------------------------------------------------------------------------------------|
|          |       |       | Standard assay                           | Modified assay                           | assay)                                                                             |
| BI_5     | 4.4   | 523.5 | 11.1                                     | 36.5                                     | 3.3                                                                                |
| BI_6     | 5.4   | 538.4 | 1.6                                      | 2.7                                      | 1.7                                                                                |
| BI_7     | 5.7   | 500.9 | 5.2                                      | 21.5                                     | 4.2                                                                                |
| BI_8     | 5.8   | 496.4 | 5.2                                      | 23.5                                     | 4.6                                                                                |
| BI_9     | 6.2   | 494.5 | 8.7                                      | 27.0                                     | 3.1                                                                                |
| BI_10    | 6.3   | 550.4 | 6.4                                      | 10.2                                     | 1.6                                                                                |
| BI_11    | 6.4   | 462.5 | 2.2                                      | 24.0                                     | 10.9                                                                               |
| BI_12    | 6.4   | 514.9 | 2.6                                      | 19.5                                     | 7.6                                                                                |
| BI_13    | 6.7   | 511.4 | 5.9                                      | 23.0                                     | 3.9                                                                                |
| BI_14    | 6.7   | 515.8 | 1.3                                      | 9.5                                      | 7.3                                                                                |
| BI_15    | 6.8   | 464.5 | 1.0                                      | 13.0                                     | 12.4                                                                               |
| BI_16    | 6.8   | 531.4 | 1.4                                      | 11.7                                     | 8.4                                                                                |
| BI_17    | 6.9   | 482.5 | 0.6                                      | 12.2                                     | 21.0                                                                               |
| BI_18    | 6.9   | 493.5 | 1.9                                      | 18.0                                     | 9.5                                                                                |
| BI_19    | 6.9   | 495.4 | 4.7                                      | 16.5                                     | 3.5                                                                                |
| BI_20    | 7     | 482.5 | 5.5                                      | 15.5                                     | 2.8                                                                                |
| BI_21    | 7     | 492.4 | 2.7                                      | 14.5                                     | 5.5                                                                                |
| BI_22    | 7     | 500.5 | 1.0                                      | 13.4                                     | 13.8                                                                               |
| BI_23    | 7.1   | 500.5 | 0.6                                      | 12.3                                     | 21.8                                                                               |
| BI_24    | 7.1   | 527.4 | 0.7                                      | 15.5                                     | 21.1                                                                               |
| BI_25    | 7.1   | 513.4 | 0.7                                      | 15.0                                     | 21.1                                                                               |
| BI_26    | 7.2   | 550.3 | 0.3                                      | 11.0                                     | 34.8                                                                               |
| BI_27    | 7.2   | 509.4 | 0.4                                      | 9.1                                      | 21.7                                                                               |
| BI_28    | 7.3   | 529.9 | 0.2                                      | 7.1                                      | 29.4                                                                               |
| BI_29    | 7.4   | 499.0 | 0.4                                      | 8.1                                      | 21.3                                                                               |
| BI_30    | 7.4   | 527.4 | 0.1                                      | 7.5                                      | 53.6                                                                               |
| BI_31    | 7.5   | 494.4 | 0.3                                      | 7.0                                      | 21.1                                                                               |
| BI_32    | 7.5   | 495.4 | 0.5                                      | 13.3                                     | 27.4                                                                               |
| BI_33    | 7.6   | 517.0 | 1.2                                      | 8.2                                      | 7.1                                                                                |
| BI_34    | 7.6   | 513.8 | 0.8                                      | 6.9                                      | 8.8                                                                                |
| BI_35    | 7.6   | 528.9 | 0.2                                      | 12.0                                     | 51.1                                                                               |
| BI_36    | 7.7   | 549.3 | 0.5                                      | 14.0                                     | 25.9                                                                               |
| BI_37    | 7.8   | 508.4 | 0.1                                      | 4.6                                      | 61.5                                                                               |
| BI_38    | 7.9   | 497.4 | 0.4                                      | 6.5                                      | 15.5                                                                               |
| BI_39    | 7.9   | 533.4 | 0.6                                      | 5.1                                      | 8.7                                                                                |
| BI_40    | 7.9   | 533.4 | 0.4                                      | 6.9                                      | 19.3                                                                               |
| BI_41    | 8     | 533.4 | 0.2                                      | 6.0                                      | 37.5                                                                               |
| BI_42    | 8.3   | 542.9 | 0.1                                      | 3.8                                      | 26.2                                                                               |
| BI_43    | 8.4   | 549.9 | 0.1                                      | 3.3                                      | 30.4                                                                               |
